# Supplementary material for: The Notch1/CD22 signaling axis disrupts Treg function in SARS-CoV-2–associated multisystem inflammatory syndrome in children
Source: J Clin Invest. 2023 Jan 3;133(1):e163235. doi: 10.1172/JCI163235 (PMC9797337; doi:10.1172/JCI163235)
Supplement: Supplemental data set 1 [file jci-133-163235-s082.xlsx]

## Sheet: Sheet1
Pathway	Pathway.ID	Pathway.CName	Pathway.Genes	Pvalue.Loss/gain of function
path:hsa04514	path:hsa04514	Cell adhesion molecules	ALCAM,CADM1,CADM3,CD2,CD22,CD226,CD274,CD276,CD28,CD34,CD4,CD40,CD40LG,CD58,CD6,CD80,CD86,CD8A,CD8B,CD8B2,CD99,CD99L2,CDH1,CDH15,CDH2,CDH3,CDH4,CDH5,CLDN1,CLDN10,CLDN11,CLDN14,CLDN15,CLDN16,CLDN17,CLDN18,CLDN19,CLDN2,CLDN20,CLDN22,CLDN23,CLDN24,CLDN25,CLDN3,CLDN34,CLDN4,CLDN5,CLDN6,CLDN7,CLDN8,CLDN9,CNTN1,CNTN2,CNTNAP1,CNTNAP2,CTLA4,ESAM,F11R,GLG1,HLA-A,HLA-B,HLA-C,HLA-DMA,HLA-DMB,HLA-DOA,HLA-DOB…	8e-07
path:hsa05164	path:hsa05164	Influenza A	ACTB,ACTG1,ADAR,AKT1,AKT2,AKT3,APAF1,BAK1,BAX,BCL2L2-PABPN1,BID,CALCOCO2,CASP1,CASP3,CASP8,CASP9,CCL2,CCL5,CCND3,CDK4,CDK6,CHUK,CIITA,CPSF4,CPSF4L,CREBBP,CXCL10,CXCL8,CYCS,DDX58,DNAJB1,DNAJC3,EIF2AK2,EIF2S1,EP300,FADD,FAS,FASLG,FDPS,HLA-DMA,HLA-DMB,HLA-DOA,HLA-DOB,HLA-DPA1,HLA-DPB1,HLA-DQA1,HLA-DQA2,HLA-DQB1,HLA-DRA,HLA-DRB1,HLA-DRB3,HLA-DRB4,HLA-DRB5,HNRNPUL1,ICAM1,IFIH1,IFNA1,IFNA10,IFNA13,IFNA…	8e-07
GO:0070374	GO:0070374	positive regulation of ERK1 and ERK2 cascade	ABCA7,ABL1,ACKR3,ADCYAP1,ADRA1A,AGER,AKAP12,ALKAL1,ALKAL2,ALOX15,ANGPT1,APELA,APOE,APP,ARHGAP8,ARRB1,ARRB2,ATP6AP1,BMP2,BMP4,BMPER,BRAF,C5AR1,C5AR2,CALCR,CARD9,CASR,CAVIN3,CCL1,CCL11,CCL13,CCL14,CCL15,CCL16,CCL17,CCL18,CCL19,CCL2,CCL20,CCL21,CCL22,CCL23,CCL24,CCL25,CCL26,CCL3,CCL3L1,CCL4,CCL4L1,CCL5,CCL7,CCL8,CCN2,CCR1,CCR7,CD36,CD4,CD44,CD74,CFLAR,CHI3L1,CHRNA7,CIB1,CRKL,CSF1R,CX3CL1,CXCL17,DDT,…	8e-07
GO:0007010	GO:0007010	cytoskeleton organization	ABI2,ABLIM1,ACTL6B,ACTL7A,ACTL7B,ADD3,AGRN,AJUBA,ANK1,ANK2,ANK3,APOE,ARAP3,ARC,ARHGAP10,ARHGAP4,BIN1,BRWD1,BRWD3,CAMSAP1,CAP2,CAPZB,CCDC6,CCL11,CCL13,CCL2,CCL24,CCL3,CCL7,CDC42BPB,CECR2,CFAP410,CFL1,CNN2,CNTNAP1,CSPG5,CTNNA2,CYLC1,CYLC2,DES,DIAPH1,DIAPH3,DMD,DMTN,DPYSL2,DST,EPB42,FGD1,FGD2,FGD3,FGD4,FGD5,FGD6,FITM2,FMNL2,FMNL3,FTCD,GAN,GPR35,HLA-DRB1,KISS1,KLHL20,KRT13,KRT15,KRT16,KRT25,KRT31,KRT…	3.6e-07
GO:0008544	GO:0008544	epidermis development	ACER1,AGPAT2,ALDH3A2,ATP2A2,ATP2C1,BNC1,CALML5,CASP14,CCN2,CDSN,CERS3,COL17A1,COL7A1,CRABP2,CST6,DCT,DSP,EDA2R,EDAR,EMP1,EVPL,EVPLL,FABP5,FGF7,FLOT2,FOXN1,GJB5,GRHL1,GRHL2,GRHL3,HLA-DRB1,HOXB13,IFT172,KLK5,KLK7,KRT14,KRT15,KRT2,KRT31,KRT32,KRT34,KRT5,KRT76,KRT83,KRT85,KRT9,KRTAP5-9,KRTDAP,LAMA3,LAMB3,LAMC2,LCE2B,NTF4,PLOD1,POU2F3,POU3F2,PPARA,PTHLH,RBP2,S100A7,SCEL,SPRR1A,SPRR1B,SPRR2A,SPRR2B,SPR…	3.6e-07
GO:0048387	GO:0048387	negative regulation of retinoic acid receptor signaling pathway	CALR,CNOT1,CYP26A1,CYP26B1,CYP26C1,DHRS3,EZH2,PRAME,ZNF536	3.6e-07
GO:0001934	GO:0001934	positive regulation of protein phosphorylation	ABL1,ACVR2A,ADAM17,ADIPOQ,ADIPOR2,ADTRP,AGER,AIF1,AKT1,AKT2,AKTIP,ANGPT1,ANXA2,APP,ARRB1,ATF2,ATG14,AXIN1,AXIN2,BMP2,BMP4,BRAT1,C3,CAMKK2,CAMP,CARD14,CCN1,CCN2,CCND1,CCND2,CCND3,CD4,CD40,CD74,CDK2AP1,CHEK2,CHRNA7,CIB1,CLDN19,CLDN3,CLIP3,CLN3,CRH,CRKL,CSF1R,CSNK1D,DAB2,DAXX,DVL1,DVL2,DVL3,EDNRB,EFNA1,EFNA5,EGFR,EIF2AK4,ENG,EPHA7,ERBB2,ERBB4,ERP29,F2,FAM20A,FAS,FAXDC2,FBH1,FGF1,FGF10,FGF16,FGF17,FG…	3.6e-07
GO:0005200	GO:0005200	structural constituent of cytoskeleton	ACTA1,ACTB,ACTG1,ACTL6B,ACTL7A,ACTL7B,ACTR2,ACTR3,ADD2,ADD3,AGRN,ANK1,ANK2,ANK3,ARPC1B,ARPC2,ARPC3,ARPC4,ARPC5,BFSP1,BFSP2,BICD1,CCDC6,CD2AP,CROCC,CTNNA2,CYLC1,CYLC2,DES,DMD,DSP,EPB41,EPB41L3,EPB41L4B,EPB42,ERBIN,GFAP,HIP1,HLA-DRB1,INA,KRT14,KRT15,KRT16,KRT19,KRT2,KRT20,KRT31,KRT5,KRT6A,KRT6B,KRT84,KRT9,LORICRIN,MSN,NEFH,NEFL,NEFM,PLEC,PLS1,PPL,SORBS2,SORBS3,SPTA1,SPTAN1,SPTB,SPTBN1,SPTBN2,SPTBN4…	3.6e-07
path:hsa04612	path:hsa04612	Antigen processing and presentation	B2M,CALR,CANX,CD4,CD74,CD8A,CD8B,CD8B2,CIITA,CREB1,CTSB,CTSL,CTSS,HLA-A,HLA-B,HLA-C,HLA-DMA,HLA-DMB,HLA-DOA,HLA-DOB,HLA-DPA1,HLA-DPB1,HLA-DQA1,HLA-DQA2,HLA-DQB1,HLA-DRA,HLA-DRB1,HLA-DRB3,HLA-DRB4,HLA-DRB5,HLA-E,HLA-F,HLA-G,HSP90AA1,HSP90AB1,HSPA1A,HSPA1B,HSPA1L,HSPA2,HSPA4,HSPA5,HSPA6,HSPA8,IFI30,IFNG,KIR2DL1,KIR2DL2,KIR2DL3,KIR2DL4,KIR2DL5A,KIR2DS1,KIR2DS2,KIR2DS3,KIR2DS4,KIR2DS5,KIR3DL1,KIR3DL2…	1.4e-07
GO:0010008	GO:0010008	endosome membrane	ABCA2,ABCC5,ABCG4,ABHD17A,ABHD17B,ABHD17C,ACAP2,ADRB2,AMN,ANKFY1,ANTXR1,ANTXR2,AP1G2,AP3D1,APH1A,APH1B,APOB,APPL1,APPL2,AQP4,ARHGAP1,ARHGAP32,ATP6AP1,ATP6AP2,ATP6V0A1,ATP6V0A2,ATP6V0A4,ATP6V0B,ATP6V0C,ATP6V0D1,ATP6V0D2,ATP6V0E1,ATP6V0E2,BACE1,BECN1,CD14,CD164,CD1A,CD1B,CD1C,CD1D,CD320,CD63,CFTR,CHMP1B,CHMP5,CHMP6,CLCN3,CLCN4,CLCN5,CLCN6,COMMD1,CORO1C,CPTP,CTSD,CUBN,DCSTAMP,DIO3,DNAJC13,DTNBP1,EGF…	1.4e-07
path:hsa04145	path:hsa04145	Phagosome	ACTB,ACTG1,ATP6AP1,ATP6V0A1,ATP6V0A2,ATP6V0A4,ATP6V0B,ATP6V0C,ATP6V0D1,ATP6V0D2,ATP6V0E1,ATP6V0E2,ATP6V1A,ATP6V1B1,ATP6V1B2,ATP6V1C1,ATP6V1C2,ATP6V1D,ATP6V1E1,ATP6V1E2,ATP6V1F,ATP6V1G1,ATP6V1G2,ATP6V1G3,ATP6V1H,C1R,C3,CALR,CANX,CD14,CD209,CD36,CLEC4M,CLEC7A,COLEC11,COLEC12,COMP,CORO1A,CTSL,CTSS,CYBA,CYBB,DYNC1H1,DYNC1I1,DYNC1I2,DYNC1LI1,DYNC1LI2,DYNC2H1,EEA1,FCAR,FCGR1A,FCGR2A,FCGR2B,FCGR2C,FCGR3…	1.4e-07
GO:0050870	GO:0050870	positive regulation of T cell activation	B2M,BCL10,CCDC88B,CCL2,CCR2,CD4,CD47,CYRIB,HLA-DMA,HLA-DMB,HLA-DOA,HLA-DOB,HLA-DPA1,HLA-DPB1,HLA-DQA1,HLA-DQA2,HLA-DQB1,HLA-DQB2,HLA-DRA,HLA-DRB1,HLA-DRB3,HLA-DRB4,HLA-DRB5,HSPD1,LCK,PRKCQ,PYCARD,SIRPA,SIRPB1,SIRPG,THY1,TNFSF11	1.4e-07
GO:0050852	GO:0050852	T cell receptor signaling pathway	ABL1,BCAR1,BCL10,BTN1A1,BTN2A1,BTN2A2,BTN2A3P,BTN3A1,BTN3A2,BTN3A3,BTNL10,BTNL2,BTNL3,BTNL8,BTNL9,CACNB3,CBLB,CD247,CD276,CD28,CD3E,CRKL,CSK,CTLA4,DENND1B,EIF2B1,EIF2B2,EIF2B3,EIF2B4,EIF2B5,ERMAP,FOXP3,FYB1,FYB2,FYN,GATA3,HHLA2,HLA-A,HLA-DPB1,HLA-DQB1,HLA-DRB1,HLA-DRB3,HRAS,ICOSLG,IKBKB,IKBKG,INPP5D,ITK,KHDRBS1,LCK,LCP2,LIME1,MALT1,MAP3K7,MAPK1,MOG,NFKBID,NFKBIZ,PDE4B,PDE4D,PIK3CA,PIK3CD,PLCG1,PL…	1.4e-07
path:hsa05152	path:hsa05152	Tuberculosis	AKT1,AKT2,AKT3,APAF1,ARHGEF12,ATP6AP1,ATP6V0A1,ATP6V0A2,ATP6V0A4,ATP6V0B,ATP6V0C,ATP6V0D1,ATP6V0D2,ATP6V1H,BAD,BAX,BCL10,BCL2,BID,C3,CALM1,CALM2,CALM3,CALML3,CALML4,CALML5,CALML6,CAMK2A,CAMK2B,CAMK2D,CAMK2G,CAMP,CARD9,CASP10,CASP3,CASP8,CASP9,CD14,CD209,CD74,CEBPB,CEBPG,CIITA,CLEC4E,CLEC4M,CLEC7A,CORO1A,CR1,CR1L,CREB1,CREBBP,CTSD,CTSS,CYCS,CYP27B1,EEA1,EP300,FADD,FCER1G,FCGR1A,FCGR2A,FCGR2B,FCGR2…	1.4e-07
path:hsa05169	path:hsa05169	Epstein-Barr virus infection	ADRM1,AKT1,AKT2,AKT3,APAF1,B2M,BAK1,BAX,BCL2,BCL2L11,BID,BLNK,BTK,CALR,CASP3,CASP8,CASP9,CCNA1,CCNA2,CCND1,CCND2,CCND3,CCNE1,CCNE2,CD19,CD247,CD3D,CD3E,CD3G,CD40,CD44,CD58,CDK2,CDK4,CDK6,CDKN1A,CDKN1B,CHUK,CIR1,CR2,CXCL10,CYCS,DDB2,DDX58,E2F1,E2F2,E2F3,EIF2AK2,ENTPD1,ENTPD3,ENTPD8,FADD,FAS,FCER2,GADD45A,GADD45B,GADD45G,HDAC1,HDAC2,HES1,HLA-A,HLA-B,HLA-C,HLA-DMA,HLA-DMB,HLA-DOA,HLA-DOB,HLA-DPA1,HL…	4e-08
GO:0012507	GO:0012507	ER to Golgi transport vesicle membrane	AREG,B2M,CD59,CD74,CNIH1,CNIH2,CNIH3,FOLR1,GOSR2,GRIA1,HLA-A,HLA-B,HLA-C,HLA-DPA1,HLA-DPB1,HLA-DQA1,HLA-DQA2,HLA-DQB1,HLA-DQB2,HLA-DRA,HLA-DRB1,HLA-DRB3,HLA-DRB4,HLA-DRB5,HLA-E,HLA-F,HLA-G,HLA-H,LMAN1,MCFD2,SAR1B,SCAP,SEC13,SEC16A,SEC16B,SEC22B,SEC23A,SEC23IP,SEC24A,SEC24B,SEC24C,SEC24D,SEC31A,SREBF1,SREBF2,STX17,STX5,TGFA,TMED10,TMED2,USO1,VMA21,VTI1A,VTI1B	4e-08
path:hsa05332	path:hsa05332	Graft-versus-host disease	CD28,CD80,CD86,FAS,FASLG,GZMB,HLA-A,HLA-B,HLA-C,HLA-DMA,HLA-DMB,HLA-DOA,HLA-DOB,HLA-DPA1,HLA-DPB1,HLA-DQA1,HLA-DQA2,HLA-DQB1,HLA-DRA,HLA-DRB1,HLA-DRB3,HLA-DRB4,HLA-DRB5,HLA-E,HLA-F,HLA-G,IFNG,IL1A,IL1B,IL2,IL6,KIR2DL1,KIR2DL2,KIR2DL3,KIR2DL5A,KIR3DL1,KIR3DL2,KIR3DL3,KLRC1,KLRD1,PRF1,TNF	4e-08
path:hsa05166	path:hsa05166	Human T-cell leukemia virus 1 infection	ADCY1,ADCY2,ADCY3,ADCY4,ADCY5,ADCY6,ADCY7,ADCY8,ADCY9,AKT1,AKT2,AKT3,ANAPC1,ANAPC10,ANAPC11,ANAPC2,ANAPC4,ANAPC5,ANAPC7,ATF2,ATF4,ATF6B,ATM,ATR,B2M,BAX,BCL2L1,BUB1B,BUB3,CALR,CANX,CCNA1,CCNA2,CCNB2,CCND1,CCND2,CCND3,CCNE1,CCNE2,CD3D,CD3E,CD3G,CD4,CD40,CDC16,CDC20,CDC23,CDC26,CDC27,CDK2,CDK4,CDKN1A,CDKN2A,CDKN2B,CDKN2C,CHEK1,CHEK2,CHUK,CREB1,CREB3,CREB3L1,CREB3L2,CREB3L3,CREB3L4,CREB5,CREBBP,CRTC1…	4e-08
GO:0006959	GO:0006959	humoral immune response	AIRE,ALOX5,BCL2,BLNK,BMI1,BST1,CCL2,CCR2,CCR6,CD28,CD83,EBI3,FOXJ1,GATA3,GPI,GPR183,HLA-DQB1,HLA-DRB1,IFNA1,IFNA10,IFNA14,IFNA16,IFNA17,IFNA2,IFNA21,IFNA4,IFNA5,IFNA6,IFNA7,IFNA8,IFNB1,IFNE,IFNG,IFNK,IFNW1,IL6,IL7,JCHAIN,LTA,LTF,MEF2C,MS4A1,NOTCH1,NOTCH2,PAX5,PDCD1,POU2AF1,POU2F2,PSMB10,RBPJ,SH2D1A,ST6GAL1,TFE3,TFEB,TNF,TNFRSF21,TRAF3IP2,TREM1,TREM2,YTHDF2	4e-08
GO:0001772	GO:0001772	immunological synapse	ALCAM,ARHGDIA,ATP2B1,BCL10,CARD11,CD28,CD37,CD3E,CD53,CD6,CD81,CORO1A,CRTAM,DLG1,DUSP3,EZR,FYB2,GZMA,GZMB,HAVCR2,HLA-DRA,HLA-DRB1,ICAM1,IL4I1,LAT,LCK,LGALS3,MYH9,NPTN,PDCD6IP,PRKAR1A,PRKCQ,PTPRJ,RHOH,SCIMP,SCRIB,SKAP1,SNX27,SOCS6,STOML2,STX7,VAV3,ZAP70	4e-08
GO:0071556	GO:0071556	integral component of lumenal side of endoplasmic reticulum membrane	BCAP31,CALR,CANX,CD74,HLA-A,HLA-B,HLA-C,HLA-DPA1,HLA-DPB1,HLA-DQA1,HLA-DQA2,HLA-DQB1,HLA-DQB2,HLA-DRA,HLA-DRB1,HLA-DRB3,HLA-DRB4,HLA-DRB5,HLA-E,HLA-F,HLA-G,HLA-H,HM13,PKD2,SPPL2A,SPPL2B,SPPL2C,SPPL3,TAPBP	4e-08
GO:0005882	GO:0005882	intermediate filament	ADORA2A,BFSP1,BFSP2,CLIP1,DES,DSP,DST,EPPK1,EVPL,EVPLL,FLG,GFAP,HLA-DRB1,IFFO1,IFFO2,JUP,KRT10,KRT12,KRT14,KRT15,KRT16,KRT17,KRT18,KRT19,KRT2,KRT20,KRT222,KRT23,KRT24,KRT25,KRT26,KRT27,KRT28,KRT3,KRT31,KRT32,KRT33A,KRT33B,KRT34,KRT35,KRT36,KRT37,KRT38,KRT39,KRT4,KRT40,KRT5,KRT6C,KRT7,KRT75,KRT76,KRT8,KRT9,KRTAP11-1,KRTAP13-1,KRTAP13-2,KRTAP13-3,KRTAP13-4,KRTAP15-1,KRTAP17-1,KRTAP19-1,KRTAP19-2,KR…	4e-08
path:hsa04672	path:hsa04672	Intestinal immune network for IgA production	AICDA,CCL25,CCL28,CCR10,CCR9,CD28,CD40,CD40LG,CD80,CD86,CXCL12,CXCR4,HLA-DMA,HLA-DMB,HLA-DOA,HLA-DOB,HLA-DPA1,HLA-DPB1,HLA-DQA1,HLA-DQA2,HLA-DQB1,HLA-DRA,HLA-DRB1,HLA-DRB3,HLA-DRB4,HLA-DRB5,ICOS,ICOSLG,IL10,IL15,IL15RA,IL2,IL4,IL5,IL6,ITGA4,ITGB7,LOC102723407,LOC102723996,LTBR,MADCAM1,MAP3K14,PIGR,TGFB1,TNFRSF13B,TNFRSF13C,TNFRSF17,TNFSF13,TNFSF13B	4e-08
GO:0042130	GO:0042130	negative regulation of T cell proliferation	ARG1,CD274,CD80,CD86,CEBPB,CLEC4G,CR1,CTLA4,DLG1,DLG5,FOXJ1,FOXP3,GLMN,GPNMB,HAVCR2,HLA-DRB1,HLA-G,IL10,IL20RB,IL2RA,IL4I1,LILRB1,LILRB2,LILRB4,LOC102723996,MAD1L1,MARCHF7,NDFIP1,PAWR,PDCD1LG2,PELI1,PLA2G2D,PLA2G2F,PTPN6,SCGB1A1,SDC4,SFTPD,SHH,SPN,TNFRSF21,VSIG4,VTCN1	4e-08
GO:0042605	GO:0042605	peptide antigen binding	CD209,CLEC4M,DHCR24,FCGRT,HFE,HLA-A,HLA-B,HLA-C,HLA-DPA1,HLA-DPB1,HLA-DQA1,HLA-DQB1,HLA-DRA,HLA-DRB1,HLA-DRB3,HLA-DRB5,HLA-E,HLA-F,HLA-G,HLA-H,MAML1,SLC7A5,SLC7A8,SLC7A9,TAP1,TAP2,TAPBP,TRAV12-1,TRAV12-2,TRAV12-3,TRAV19,TRAV23DV6,TRAV29DV5,TRAV8-4,TRBV12-3,TRBV7-9,TRGV3,TRGV9	4e-08
GO:0033674	GO:0033674	positive regulation of kinase activity	ALK,AXL,BCL10,CD4,CD74,CSF1R,DDR1,DDR2,DRD4,DSTYK,EGFR,EPHA1,EPHA10,EPHA2,EPHA3,EPHA4,EPHA5,EPHA6,EPHA7,EPHA8,EPHB1,EPHB2,EPHB3,EPHB4,EPHB6,ERBB2,ERBB3,ERBB4,FGFR1,FGFR2,FGFR3,FGFR4,FLT1,FLT3,FLT4,GCN1,HLA-DRB1,IGF1R,IL2,INSR,INSRR,KDR,KIT,LAMTOR3,LMO4,LMTK2,LTK,MERTK,MET,MOB1B,MRE11,MST1R,MUSK,NBN,NTRK1,NTRK2,NTRK3,PDGFRA,PDGFRB,PIFO,RAD50,RET,ROR1,ROR2,ROS1,RYK,TEK,TIE1,TREM2,TYRO3,VAC14,ZNF16,…	4e-08
GO:0001916	GO:0001916	positive regulation of T cell mediated cytotoxicity	AZGP1,B2M,CD1A,CD1B,CD1C,CD1D,CD1E,CYRIB,FADD,HLA-A,HLA-B,HLA-DRA,HLA-DRB1,HLA-E,HLA-F,HLA-G,HLA-H,IL12A,IL12B,IL12RB1,IL23A,IL23R,PTPRC,STX7,XCL1	4e-08
path:hsa05150	path:hsa05150	Staphylococcus aureus infection	C1QA,C1QB,C1QC,C1R,C1S,C2,C3,C3AR1,C4A,C4B,C5,C5AR1,CAMP,CFB,CFD,CFH,CFI,DEFA1,DEFA1B,DEFA3,DEFA4,DEFA5,DEFA6,DEFB1,DEFB103A,DEFB103B,DEFB4A,DEFB4B,DSG1,FCAR,FCGR1A,FCGR2A,FCGR2B,FCGR2C,FCGR3A,FCGR3B,FGG,FPR1,FPR2,FPR3,HLA-DMA,HLA-DMB,HLA-DOA,HLA-DOB,HLA-DPA1,HLA-DPB1,HLA-DQA1,HLA-DQA2,HLA-DQB1,HLA-DRA,HLA-DRB1,HLA-DRB3,HLA-DRB4,HLA-DRB5,ICAM1,IL10,ITGAL,ITGAM,ITGB2,KRT10,KRT12,KRT13,KRT14,KRT15,…	4e-08
GO:0032588	GO:0032588	trans-Golgi network membrane	AFTPH,AP1B1,AP1G1,AP1M1,AP1M2,AP1S1,AP1S2,AP1S3,AP4B1,AP4E1,AP4M1,AP4S1,APP,ARFIP1,ARFIP2,ARFRP1,ARL1,ATP2C2,ATP7A,ATP7B,ATP9A,BAIAP3,BOK,BPNT2,CABP7,CALN1,CD74,CLBA1,CLIP3,CLTA,CLTC,CLVS1,CLVS2,COG1,COG2,COG3,COG4,COG5,COG6,COG7,COG8,FUT9,GOLPH3L,HLA-DPA1,HLA-DPB1,HLA-DQA1,HLA-DQA2,HLA-DQB1,HLA-DQB2,HLA-DRA,HLA-DRB1,HLA-DRB3,HLA-DRB4,HLA-DRB5,HTR7,IGF2R,KIF13A,LGR5,LGR6,LLGL1,M6PR,MARCHF1,MMP24,…	4e-08
path:hsa05416	path:hsa05416	Viral myocarditis	ABL1,ABL2,ACTB,ACTG1,BID,CASP3,CASP8,CASP9,CAV1,CCND1,CD28,CD40,CD40LG,CD55,CD80,CD86,CXADR,CYCS,DAG1,DMD,EIF4G1,EIF4G2,EIF4G3,FYN,HLA-A,HLA-B,HLA-C,HLA-DMA,HLA-DMB,HLA-DOA,HLA-DOB,HLA-DPA1,HLA-DPB1,HLA-DQA1,HLA-DQA2,HLA-DQB1,HLA-DRA,HLA-DRB1,HLA-DRB3,HLA-DRB4,HLA-DRB5,HLA-E,HLA-F,HLA-G,ICAM1,ITGAL,ITGB2,LAMA1,LAMA2,LOC102723407,MYH6,MYH7,PRF1,RAC1,RAC2,RAC3,SGCA,SGCB,SGCD,SGCG	4e-08
path:hsa05330	path:hsa05330	Allograft rejection	CD28,CD40,CD40LG,CD80,CD86,FAS,FASLG,GZMB,HLA-A,HLA-B,HLA-C,HLA-DMA,HLA-DMB,HLA-DOA,HLA-DOB,HLA-DPA1,HLA-DPB1,HLA-DQA1,HLA-DQA2,HLA-DQB1,HLA-DRA,HLA-DRB1,HLA-DRB3,HLA-DRB4,HLA-DRB5,HLA-E,HLA-F,HLA-G,IFNG,IL10,IL12A,IL12B,IL2,IL4,IL5,LOC102723407,PRF1,TNF	6.9e-09
GO:0019886	GO:0019886	antigen processing and presentation of exogenous peptide antigen via MHC class II	B2M,CD74,CTSD,CTSE,CTSF,CTSL,CTSS,CTSV,DNM2,FCER1G,FCGR2B,HLA-DMA,HLA-DMB,HLA-DOA,HLA-DOB,HLA-DPA1,HLA-DPB1,HLA-DQA1,HLA-DQA2,HLA-DQB1,HLA-DQB2,HLA-DRA,HLA-DRB1,HLA-DRB3,HLA-DRB4,HLA-DRB5,IFI30,LGMN,PIKFYVE,TRAF6	6.9e-09
path:hsa05310	path:hsa05310	Asthma	CCL11,CD40,CD40LG,EPX,FCER1A,FCER1G,HLA-DMA,HLA-DMB,HLA-DOA,HLA-DOB,HLA-DPA1,HLA-DPB1,HLA-DQA1,HLA-DQA2,HLA-DQB1,HLA-DRA,HLA-DRB1,HLA-DRB3,HLA-DRB4,HLA-DRB5,IL10,IL13,IL3,IL4,IL5,IL9,LOC102723407,MS4A2,PRG2,RNASE3,TNF	6.9e-09
path:hsa05320	path:hsa05320	Autoimmune thyroid disease	CD28,CD40,CD40LG,CD80,CD86,CGA,CTLA4,FAS,FASLG,GZMB,HLA-A,HLA-B,HLA-C,HLA-DMA,HLA-DMB,HLA-DOA,HLA-DOB,HLA-DPA1,HLA-DPB1,HLA-DQA1,HLA-DQA2,HLA-DQB1,HLA-DRA,HLA-DRB1,HLA-DRB3,HLA-DRB4,HLA-DRB5,HLA-E,HLA-F,HLA-G,IFNA1,IFNA10,IFNA13,IFNA14,IFNA16,IFNA17,IFNA2,IFNA21,IFNA4,IFNA5,IFNA6,IFNA7,IFNA8,IL10,IL2,IL4,IL5,LOC102723407,PRF1,TG,TPO,TSHB,TSHR	6.9e-09
GO:0042609	GO:0042609	CD4 receptor binding	CD22,CD74,FYN,HLA-DRB1,IL16,LCK,PLSCR1,PLSCR4,SPG21	6.9e-09
GO:0030669	GO:0030669	clathrin-coated endocytic vesicle membrane	ADRB2,AP2A1,AP2A2,AP2B1,AP2M1,AP2S1,APOB,APOE,AREG,AVP,AVPR2,BTC,CD207,CD3D,CD3G,CD4,CD74,CD9,CFTR,CHRM2,CLTC,EGF,EGFR,EPGN,EREG,FCGR1A,FCGR1B,FZD2,FZD4,FZD5,HBEGF,HLA-DPA1,HLA-DPB1,HLA-DQA1,HLA-DQA2,HLA-DQB1,HLA-DQB2,HLA-DRA,HLA-DRB1,HLA-DRB3,HLA-DRB4,HLA-DRB5,IGF2R,IL7R,KIAA0319,LDLR,LDLRAP1,LRP2,M6PR,RAB35,RAB5A,ROR2,SCARB2,SH3GL2,SLC18A3,SLC2A8,SYT1,SYT2,SYT9,TF,TFRC,TGFA,TGOLN2,TYRP1,VAMP2,V…	6.9e-09
GO:0016045	GO:0016045	detection of bacterium	CD1D,HLA-A,HLA-B,HLA-DRB1,NAIP,NLRC4,NOD1,NOD2,PGLYRP1,PGLYRP2,PGLYRP3,PGLYRP4	6.9e-09
GO:0030666	GO:0030666	endocytic vesicle membrane	ACE2,AP2A1,AP2A2,AP2B1,AP2M1,AP2S1,CACNG2,CACNG3,CACNG4,CACNG8,CAMK2A,CAMK2B,CAMK2D,CAMK2G,CAV1,CD163,CD36,CD74,CD9,COLEC12,CSF3R,DLG4,DNM2,ENTPD7,GPR161,GRIA1,GRIA2,GRIA3,GRIA4,HBEGF,HLA-DPA1,HLA-DPB1,HLA-DQA1,HLA-DQA2,HLA-DQB1,HLA-DQB2,HLA-DRA,HLA-DRB1,HLA-DRB3,HLA-DRB4,HLA-DRB5,LRP1,LYN,MARCO,MDM2,MSR1,NOS3,NOSTRIN,PICK1,PTCH1,RPS27A,SCARB1,SCARB2,SCARF1,SMO,STAB1,STAB2,UBA52,UBB,UBC,WASL,WLS,…	6.9e-09
GO:0002381	GO:0002381	immunoglobulin production involved in immunoglobulin mediated immune response	B2M,GAPT,HLA-DMA,HLA-DMB,HLA-DOA,HLA-DOB,HLA-DPA1,HLA-DPB1,HLA-DQA1,HLA-DQA2,HLA-DQB1,HLA-DQB2,HLA-DRA,HLA-DRB1,HLA-DRB3,HLA-DRB4,HLA-DRB5	6.9e-09
path:hsa05321	path:hsa05321	Inflammatory bowel disease	FOXP3,GATA3,HLA-DMA,HLA-DMB,HLA-DOA,HLA-DOB,HLA-DPA1,HLA-DPB1,HLA-DQA1,HLA-DQA2,HLA-DQB1,HLA-DRA,HLA-DRB1,HLA-DRB3,HLA-DRB4,HLA-DRB5,IFNG,IFNGR1,IFNGR2,IL10,IL12A,IL12B,IL12RB1,IL12RB2,IL13,IL17A,IL17F,IL18,IL18R1,IL18RAP,IL1A,IL1B,IL2,IL21,IL21R,IL22,IL23A,IL23R,IL2RG,IL4,IL4R,IL5,IL6,JUN,MAF,NFATC1,NFKB1,NOD2,RELA,RORA,RORC,SMAD2,SMAD3,STAT1,STAT3,STAT4,STAT6,TBX21,TGFB1,TGFB2,TGFB3,TLR2,TLR4,T…	6.9e-09
GO:0002437	GO:0002437	inflammatory response to antigenic stimulus	CD68,CYSLTR1,HLA-DRB1,HMGB1,HMGB2,IL1F10,IL1RN,IL20RB,IL25,IL2RA,IL36A,IL36B,IL36G,IL36RN,IL37,IL5RA,KDM6B,NOTCH1,NOTCH2,PNMA1,RASGRP1,RBPJ,TREX1	6.9e-09
GO:0031902	GO:0031902	late endosome membrane	ABCA5,ABHD6,ADAM30,ANXA2,ANXA6,ANXA8,AP5M1,AP5S1,ARL8A,ARL8B,ATG9A,ATP10B,ATP13A2,ATP13A3,ATP13A4,BAIAP3,CD63,CD68,CHMP1B,CHMP2A,CHMP2B,CHMP3,CHMP4A,CHMP4B,CHMP4C,CHMP6,CLCN3,CLCN4,CLN3,CYB561A3,ELAPOR1,FIG4,GALNTL5,GOSR2,HLA-DMA,HLA-DMB,HLA-DRA,HLA-DRB1,HLA-DRB3,HLA-DRB4,HLA-DRB5,IFITM2,IFITM3,LAMP1,LAMP2,LAMP3,LAMP5,LAMTOR1,LAPTM4A,LAPTM4B,MARCHF1,MARCHF8,MCOLN1,MCOLN2,MCOLN3,MICALL1,MITD1,MMD,…	6.9e-09
path:hsa05140	path:hsa05140	Leishmaniasis	C3,CR1,CR1L,CYBA,CYBB,EEF1A1,EEF1A2,ELK1,FCGR1A,FCGR2A,FCGR2C,FCGR3A,FCGR3B,FOS,HLA-DMA,HLA-DMB,HLA-DOA,HLA-DOB,HLA-DPA1,HLA-DPB1,HLA-DQA1,HLA-DQA2,HLA-DQB1,HLA-DRA,HLA-DRB1,HLA-DRB3,HLA-DRB4,HLA-DRB5,IFNG,IFNGR1,IFNGR2,IL10,IL12A,IL12B,IL1A,IL1B,IL4,IRAK1,IRAK4,ITGA4,ITGAM,ITGB1,ITGB2,JAK1,JAK2,JUN,LOC102723407,MAP3K7,MAPK1,MAPK11,MAPK12,MAPK13,MAPK14,MAPK3,MARCKSL1,MYD88,NCF1,NCF2,NCF4,NFKB1,NF…	6.9e-09
GO:0030225	GO:0030225	macrophage differentiation	BMP4,CASP8,CD4,CDC42,CEBPA,CEBPE,CSF1,CSF1R,CSF2,EIF2AK1,GAB3,HLA-DRB1,IFNG,IL15,IL31RA,L3MBTL3,MMP9,NKX2-3,PARP1,SIRT1,SPI1,VEGFA	6.9e-09
GO:0042613	GO:0042613	MHC class II protein complex	B2M,CD74,HLA-DMA,HLA-DMB,HLA-DOA,HLA-DOB,HLA-DPA1,HLA-DPB1,HLA-DQA1,HLA-DQA2,HLA-DQB1,HLA-DQB2,HLA-DRA,HLA-DRB1,HLA-DRB3,HLA-DRB4,HLA-DRB5	6.9e-09
GO:0023026	GO:0023026	MHC class II protein complex binding	ANXA11,ATP1B1,B2M,CD4,CD74,CD81,HLA-DMA,HLA-DMB,HLA-DOA,HLA-DOB,HLA-DPA1,HLA-DPB1,HLA-DQA1,HLA-DQA2,HLA-DQB1,HLA-DQB2,HLA-DRA,HLA-DRB1,HLA-DRB3,HLA-DRB4,HLA-DRB5,HSP90AA1,HSP90AB1,HSPA8,MS4A1,PKM,YWHAE	6.9e-09
GO:0032395	GO:0032395	MHC class II receptor activity	HLA-DOA,HLA-DOB,HLA-DPA1,HLA-DQA1,HLA-DQA2,HLA-DQB1,HLA-DQB2,HLA-DRA,HLA-DRB1,HLA-DRB3	6.9e-09
GO:0002862	GO:0002862	negative regulation of inflammatory response to antigenic stimulus	FGR,FURIN,FYN,GPX1,HCK,HLA-DRB1,IL12B,LYN,MAPK14,NLRP6,NOD2,PLCG1,PLK2,PSMB4,RHBDF2,SRC,SYK,TREM2,YES1	6.9e-09
GO:0032689	GO:0032689	negative regulation of interferon-gamma production	AXL,C1QBP,CD274,CD96,CR1,DDIT3,FOXP3,GAS6,GATA3,HAVCR2,HLA-DRB1,HMGB1,IL10,IL1RL1,IL20RB,IL36RN,INHA,INHBA,LAPTM5,LGALS7,LGALS9,LGALS9B,LGALS9C,LILRB1,LILRB4,NLRP6,NOD2,NR1H4,PDCD1LG2,PGLYRP1,PGLYRP2,PRNP,RARA,SCGB1A1,SLAMF1,TLR4,TNFSF4,VSIR,XCL1,ZC3H12A	6.9e-09
GO:0002503	GO:0002503	peptide antigen assembly with MHC class II protein complex	B2M,HLA-DMA,HLA-DMB,HLA-DOA,HLA-DOB,HLA-DPA1,HLA-DPB1,HLA-DQA1,HLA-DQA2,HLA-DQB1,HLA-DQB2,HLA-DRA,HLA-DRB1,HLA-DRB3,HLA-DRB4,HLA-DRB5	6.9e-09
GO:0030247	GO:0030247	polysaccharide binding	AGL,CLEC18A,CLEC18B,CLEC18C,CLEC4G,ENDOU,ENPP1,ENPP2,HLA-DRA,HLA-DRB1,PRG4,STBD1,VTN	6.9e-09
GO:0035774	GO:0035774	positive regulation of insulin secretion involved in cellular response to glucose stimulus	ABCG1,ADCY8,ANO1,BAD,BAIAP3,C1QTNF12,C2CD2L,CAMK2N1,CFTR,CRH,DYNLL1,GCG,GHRL,GPLD1,GPR27,GPR68,HIF1A,HLA-DRB1,KIF5B,LRP1,MPC2,NADK,OSBP,OXCT1,PDX1,PHPT1,PLA2G6,PPARD,PPP3CB,RAC1,RFX6,SRI,STX4,SYBU,TRPM4,VSNL1	6.9e-09
GO:0043410	GO:0043410	positive regulation of MAPK cascade	ADRA1A,ADRA1B,ADRA1D,ADRA2A,ADRA2B,ADRA2C,ADRB2,ADRB3,ALK,ALOX12B,AR,AVPI1,AVPR1B,BANK1,BCAR3,BMP2,BMP4,C1QTNF1,CARTPT,CAV2,CD4,CD74,CD81,CDH2,CDK10,CHRNA7,CSPG4,CTNNB1,CX3CL1,DAB2IP,DHX33,DOK4,DOK5,DOK6,DUSP19,EFNA1,EGF,EIF2AK2,EPHA8,ERBB2,F2R,FCRL3,FGF10,FGF2,FGF9,FGFR1,FGFR2,FGFR3,FLT1,FLT3,FLT4,FRS2,GDF15,GFRAL,GHRL,GPER1,GPR37,GPR37L1,GRM1,GRM4,GSDME,HGF,HLA-DRB1,HMGB1,HRAS,IAPP,IGF1,IGF1R,I…	6.9e-09
GO:0043382	GO:0043382	positive regulation of memory T cell differentiation	CD46,HLA-DRA,HLA-DRB1,IL12B,IL12RB1,IL23A,IL23R,PCK1,TNFSF4	6.9e-09
GO:0045657	GO:0045657	positive regulation of monocyte differentiation	ACIN1,CD4,CD74,CSF1,CTNNBIP1,DCSTAMP,FES,HLA-DRB1,IL34,JUN,ZFP36L1	6.9e-09
GO:0051262	GO:0051262	protein tetramerization	CPSF6,CPSF7,CUTC,HLA-DRB1,HOMER1,KCNC1,KCNC3,MS4A1,NUDT21,OXA1L,PKD2,SHMT2,SNCA,STK3,STK4,TP53,TP63,TP73,TRPM1,TRPM3,TRPM6,TRPM7	6.9e-09
GO:0044323	GO:0044323	retinoic acid-responsive element binding	NR2F1,RARA,RXRA,RXRB,RXRG,ZNF536	6.9e-09
path:hsa05323	path:hsa05323	Rheumatoid arthritis	ACP5,ANGPT1,ATP6AP1,ATP6V0A1,ATP6V0A2,ATP6V0A4,ATP6V0B,ATP6V0C,ATP6V0D1,ATP6V0D2,ATP6V0E1,ATP6V0E2,ATP6V1A,ATP6V1B1,ATP6V1B2,ATP6V1C1,ATP6V1C2,ATP6V1D,ATP6V1E1,ATP6V1E2,ATP6V1F,ATP6V1G1,ATP6V1G2,ATP6V1G3,ATP6V1H,CCL2,CCL20,CCL3,CCL3L1,CCL3L3,CCL5,CD28,CD80,CD86,CSF1,CSF2,CTLA4,CTSK,CTSL,CXCL1,CXCL12,CXCL2,CXCL3,CXCL5,CXCL6,CXCL8,FLT1,FOS,HLA-DMA,HLA-DMB,HLA-DOA,HLA-DOB,HLA-DPA1,HLA-DPB1,HLA-DQA1,…	6.9e-09
GO:0042608	GO:0042608	T cell receptor binding	CD3E,CD3G,DOCK2,EPS8L1,FYN,HLA-A,HLA-DRA,HLA-DRB1,HLA-E,LCK,MR1	6.9e-09
GO:0042088	GO:0042088	T-helper 1 type immune response	BCL3,EBI3,HLA-DRB1,HRAS,IL12B,IL18,IL18BP,TLR4,TRAF6	6.9e-09
path:hsa04658	path:hsa04658	Th1 and Th2 cell differentiation	CD247,CD3D,CD3E,CD3G,CD4,CHUK,DLL1,DLL3,DLL4,FOS,GATA3,HLA-DMA,HLA-DMB,HLA-DOA,HLA-DOB,HLA-DPA1,HLA-DPB1,HLA-DQA1,HLA-DQA2,HLA-DQB1,HLA-DRA,HLA-DRB1,HLA-DRB3,HLA-DRB4,HLA-DRB5,IFNG,IFNGR1,IFNGR2,IKBKB,IKBKG,IL12A,IL12B,IL12RB1,IL12RB2,IL13,IL2,IL2RA,IL2RB,IL2RG,IL4,IL4R,IL5,JAG1,JAG2,JAK1,JAK2,JAK3,JUN,LAT,LCK,MAF,MAML1,MAML2,MAML3,MAPK1,MAPK10,MAPK11,MAPK12,MAPK13,MAPK14,MAPK3,MAPK8,MAPK9,NFATC1…	6.9e-09
path:hsa04659	path:hsa04659	Th17 cell differentiation	AHR,CD247,CD3D,CD3E,CD3G,CD4,CHUK,EBI3,FOS,FOXP3,GATA3,HIF1A,HLA-DMA,HLA-DMB,HLA-DOA,HLA-DOB,HLA-DPA1,HLA-DPB1,HLA-DQA1,HLA-DQA2,HLA-DQB1,HLA-DRA,HLA-DRB1,HLA-DRB3,HLA-DRB4,HLA-DRB5,HSP90AA1,HSP90AB1,IFNG,IFNGR1,IFNGR2,IKBKB,IKBKG,IL12RB1,IL17A,IL17F,IL1B,IL1R1,IL1RAP,IL2,IL21,IL21R,IL22,IL23A,IL23R,IL27,IL27RA,IL2RA,IL2RB,IL2RG,IL4,IL4R,IL6,IL6R,IL6ST,IRF4,JAK1,JAK2,JAK3,JUN,LAT,LCK,MAPK1,MAPK10…	6.9e-09
path:hsa05145	path:hsa05145	Toxoplasmosis	AKT1,AKT2,AKT3,ALOX5,BAD,BCL2,BCL2L1,BIRC2,BIRC3,BIRC7,CASP3,CASP8,CASP9,CCR5,CD40,CD40LG,CHUK,CIITA,CYCS,GNAI1,GNAI2,GNAI3,GNAO1,HLA-DMA,HLA-DMB,HLA-DOA,HLA-DOB,HLA-DPA1,HLA-DPB1,HLA-DQA1,HLA-DQA2,HLA-DQB1,HLA-DRA,HLA-DRB1,HLA-DRB3,HLA-DRB4,HLA-DRB5,HSPA1A,HSPA1B,HSPA1L,HSPA2,HSPA6,HSPA8,IFNG,IFNGR1,IFNGR2,IKBKB,IKBKG,IL10,IL10RA,IL10RB,IL12A,IL12B,IRAK1,IRAK4,IRGM,ITGA6,ITGB1,JAK1,JAK2,LAMA1,LA…	6.9e-09
GO:0030658	GO:0030658	transport vesicle membrane	ABCA12,AQP2,ARFGEF3,CA4,CD74,CEACAM1,CPE,DBH,ECE2,EEF1AKMT4-ECE2,HLA-DPA1,HLA-DPB1,HLA-DQA1,HLA-DQA2,HLA-DQB1,HLA-DQB2,HLA-DRA,HLA-DRB1,HLA-DRB3,HLA-DRB4,HLA-DRB5,ITPR1,MAP6,PAM,PTPRN,RAB11FIP5,RAB1A,RPH3AL,SCG3,SCGN,SLC30A8,SNTB2,SORL1,SPRED2,SYT10,SYT3,SYTL4,TMEM184A,TMEM30A	6.9e-09
path:hsa04940	path:hsa04940	Type I diabetes mellitus	CD28,CD80,CD86,CPE,FAS,FASLG,GAD1,GAD2,GZMB,HLA-A,HLA-B,HLA-C,HLA-DMA,HLA-DMB,HLA-DOA,HLA-DOB,HLA-DPA1,HLA-DPB1,HLA-DQA1,HLA-DQA2,HLA-DQB1,HLA-DRA,HLA-DRB1,HLA-DRB3,HLA-DRB4,HLA-DRB5,HLA-E,HLA-F,HLA-G,HSPD1,ICA1,IFNG,IL12A,IL12B,IL1A,IL1B,IL2,INS,LTA,PRF1,PTPRN,PTPRN2,TNF	6.9e-09
GO:0043123	GO:0043123	positive regulation of I-kappaB kinase/NF-kappaB signaling	ABL1,ADIPOQ,AJUBA,AKAP13,ALPK1,ANKRD17,APOL3,ATP2C1,BCL10,BIRC2,BIRC3,BRD4,BST2,C18ORF32,CANT1,CARD11,CARD16,CARD9,CASP1,CASP10,CASP8,CC2D1A,CCDC22,CCL19,CCL21,CCR7,CD36,CD4,CD40,CD74,CFLAR,CHUK,CLEC6A,CLEC7A,CTH,CTNNB1,CX3CL1,CXXC5,DDX1,DDX21,DHX36,ECM1,ECT2,EDA,EDA2R,EDAR,EEF1D,F2R,F2RL1,FADD,FASLG,FKBP1A,FLNA,FYN,GAPDH,GJA1,GOLT1B,GPR89A,GPRC5B,HLA-DRB1,HMOX1,HTR2B,IFIT5,IKBKB,IKBKE,IKBKG,INAV…	1e-09
GO:0046598	GO:0046598	positive regulation of viral entry into host cell	CD4,CD74,HLA-DRB1,LGALS1,LGALS9,P4HB,TMPRSS2,TMPRSS4,TRIM11,TRIM21,TRIM38	1.5e-10
path:hsa05322	path:hsa05322	Systemic lupus erythematosus	ACTN1,ACTN4,C1QA,C1QB,C1QC,C1R,C1S,C2,C3,C4A,C4B,C5,C6,C7,C8A,C8B,C8G,C9,CD28,CD40,CD40LG,CD80,CD86,CTSG,ELANE,FCGR1A,FCGR2A,FCGR3A,FCGR3B,GRIN2A,GRIN2B,H2AB1,H2AB2,H2AB3,H2AC1,H2AC11,H2AC12,H2AC13,H2AC14,H2AC15,H2AC16,H2AC17,H2AC18,H2AC19,H2AC20,H2AC21,H2AC4,H2AC6,H2AC7,H2AC8,H2AJ,H2AW,H2AX,H2AZ1,H2AZ2,H2BC1,H2BC10,H2BC11,H2BC12,H2BC13,H2BC14,H2BC15,H2BC17,H2BC18,H2BC21,H2BC3,H2BC4,H2BC5,H2BC6,H…	1.5e-10
