# Supplementary material for: The Notch1/CD22 signaling axis disrupts Treg function in SARS-CoV-2–associated multisystem inflammatory syndrome in children
Source: J Clin Invest. 2023 Jan 3;133(1):e163235. doi: 10.1172/JCI163235 (PMC9797337; doi:10.1172/JCI163235)
Supplement: Supplemental data set 3 [file jci-133-163235-s084.xlsx]

## Sheet: Sheet1
Chromosome	Position	REF	ALT	Gene	Transcript	Effect	Depth	Zygosity	GnomAD AF	GnomAD AC	Coding Change	Protein Change	Prediction	SpliceAI DS AG	SpliceAI DS AL	SpliceAI DS DG	SpliceAI DS DL	pLI	Missense z-score	pRec	Known Variants	Allele Bias
chr14	73759579	G	A	NUMB	NUMB,NM_001005745.1:c.280C>T,NP_001005745.1:p.Leu94Phe	missense variant	44	HET	0	0	c.280C>T	p.Leu94Phe	Damaging	0.0000	0.0000	0.0000	0.0000	0.0243991693428803	1.54877728996071	0.972755138233218		36
chr19	41190335	C	A	NUMBL	NUMBL,NM_004756.5:c.236G>T,NP_004747.1:p.Ser79Ile	missense variant	22	HET	0	0	c.236G>T	p.Ser79Ile	Damaging	0.0000	0.0000	0.0038	0.0007	0.751917062061139	2.86743253941752	0.247993310695927		23
chr19	41188861	C	T	NUMBL	NUMBL,NM_004756.5:c.262G>A,NP_004747.1:p.Val88Met	missense variant	43	HET	1.59714e-05	4	c.262G>A	p.Val88Met	Damaging	0.0000	0.0000	0.0001	0.0000	0.751917062061139	2.86743253941752	0.247993310695927		44
chr1	120548029	C	G	NOTCH2	NOTCH2,NM_024408.4:c.338G>C,NP_077719.2:p.Arg113Pro	missense variant	499	HET	1.99089e-05	5	c.338G>C	p.Arg113Pro	Damaging	0.0003	0.0000	0.0010	0.0000	0.999999993249444	3.78341278194049	6.75055638780422e-09		46
chr14	73746140	G	A	NUMB	NUMB,NM_003744.5:c.1064-8C>T,	splice region variant & intron variant	116	HET	7.16921e-05	15	c.1064-8C>T		Unknown	0.0018	0.0253	0.0000	0.0000	0.0243991693428803	1.54877728996071	0.972755138233218		50
chr1	120458348	C	G	NOTCH2	NOTCH2,NM_024408.4:c.6997G>C,NP_077719.2:p.Ala2333Pro	missense variant	92	HET	6.89476e-05	17	c.6997G>C	p.Ala2333Pro	Neutral	0.0000	0.0000	0.0000	0.0000	0.999999993249444	3.78341278194049	6.75055638780422e-09	CLINVAR, 2, https://www.ncbi.nlm.nih.gov/clinvar/variation/463177	57
chr20	43942153	G	A	RBPJL	RBPJL,NM_014276.4:c.665G>A,NP_055091.2:p.Arg222His	missense variant	12	HET	6.77631e-05	17	c.665G>A	p.Arg222His	Damaging	0.0076	0.0816	0.0000	0.0000	1.89367601104857e-11	1.46374329171576	0.0610269573374025		67
chr7	2565157	G	A	LFNG	LFNG,NM_001040167.2:c.691G>A,NP_001035257.1:p.Asp231Asn	missense variant	90	HET	7.69468e-05	19	c.691G>A	p.Asp231Asn	Damaging	0.0001	0.0000	0.0037	0.0000	0.424039268574049	2.91380814703017	0.568359641656371	CLINVAR, 3, https://www.ncbi.nlm.nih.gov/clinvar/variation/498504	57
chr9	139390791	G	A	NOTCH1	NOTCH1,NM_017617.5:c.7400C>T,NP_060087.3:p.Ser2467Leu	missense variant	14	HET	0.00012512	27	c.7400C>T	p.Ser2467Leu	Damaging	0.0002	0	0	0	1	4.48151	5.67938e-09	CLINVAR, 3, https://www.ncbi.nlm.nih.gov/clinvar/variation/134947	43
chr6	170598648	G	T	DLL1	DLL1,NM_005618.4:c.303C>A,NP_005609.3:p.Asp101Glu	missense variant	68	HET	0.000253013	33	c.303C>A	p.Asp101Glu	Damaging	0.0000	0.0000	0.0001	0.0003	0.999053067436918	2.22870570771942	0.000946923298646302		41
chr6	170592511	G	A	DLL1	DLL1,NM_005618.4:c.1856C>T,NP_005609.3:p.Ala619Val	missense variant	78	HET	0.000152558	38	c.1856C>T	p.Ala619Val	Neutral	0.0004	0.0000	0.0061	0.0000	0.999053067436918	2.22870570771942	0.000946923298646302		51
chr14	73749156	T	C	NUMB	NUMB,NM_001005745.1:c.974A>G,NP_001005745.1:p.Asn325Ser	missense variant	255	HET	0.000222733	56	c.974A>G	p.Asn325Ser	Damaging	0.0084	0.0000	0.0000	0.0000	0.0243991693428803	1.54877728996071	0.972755138233218		49
chr9	139411768	C	T	NOTCH1	NOTCH1,NM_017617.5:c.1511G>A,NP_060087.3:p.Arg504His	missense variant	33	HET	0.00024013	58	c.1511G>A	p.Arg504His	Damaging	0.0001	0	0	0	1	4.48151	5.67938e-09	CLINVAR, 2, https://www.ncbi.nlm.nih.gov/clinvar/variation/241118	39
chr14	73822331	T	G	NUMB	NUMB,NM_001005745.1:c.126+3A>C,	splice region variant & intron variant	47	HET	0.000252313	63	c.126+3A>C		Unknown	0.0000	0.0000	0.0152	0.0098	0.0243991693428803	1.54877728996071	0.972755138233218
chr6	170597384	C	T	DLL1	DLL1,NM_005618.4:c.613G>A,NP_005609.3:p.Gly205Arg	missense variant	180	HET	0.000302471	76	c.613G>A	p.Gly205Arg	Damaging	0.0013	0.0000	0.1333	0.0000	0.999053067436918	2.22870570771942	0.000946923298646302		46
chr19	15290896	C	G	NOTCH3	NOTCH3,NM_000435.3:c.3314G>C,NP_000426.2:p.Gly1105Ala	missense variant	11	HET	0.000378845	95	c.3314G>C	p.Gly1105Ala	Damaging	0.0000	0.0000	0.0000	0.0000	0.207712384985181	4.7902163440753	0.792287613907435	CLINVAR, 1, https://www.ncbi.nlm.nih.gov/clinvar/variation/702577	82
chr9	139418309	C	T	NOTCH1	NOTCH1,NM_017617.5:c.263G>A,NP_060087.3:p.Ser88Asn	missense variant	21	HET	0.000478291	116	c.263G>A	p.Ser88Asn	Neutral	0.0000	0.0000	0.0000	0.0000	0.999999994320622	4.4815122125909	5.67937835833025e-09	CLINVAR, 2, https://www.ncbi.nlm.nih.gov/clinvar/variation/376894	76
chr19	15276895	G	A	NOTCH3	NOTCH3,NM_000435.3:c.5370C>T,NP_000426.2:p.Phe1790%3D	synonymous variant	154	HET	0.000574777	144	c.5370C>T	p.Phe1790=	Unknown	0.0059	0.0044	0.0000	0.0000	0.207712384985181	4.7902163440753	0.792287613907435	CLINVAR, 1, https://www.ncbi.nlm.nih.gov/clinvar/variation/256142	51
chr1	120491644	G	A	NOTCH2	NOTCH2,NM_024408.4:c.2585C>T,NP_077719.2:p.Ala862Val	missense variant	117	HET	0.000668338	168	c.2585C>T	p.Ala862Val	Damaging	0.0002	0.0000	0.0001	0.0072	0.999999993249444	3.78341278194049	6.75055638780422e-09	CLINVAR, 1, https://www.ncbi.nlm.nih.gov/clinvar/variation/134963	35
